# Supplementary material
Source: Springer Nature journal article supplement (https://www.springermedizin.de/resource/supplementary/12933_2010_251_MOESM2_ESM.pdf/9539940)

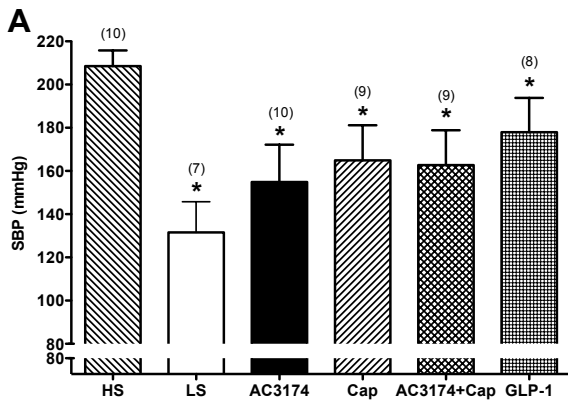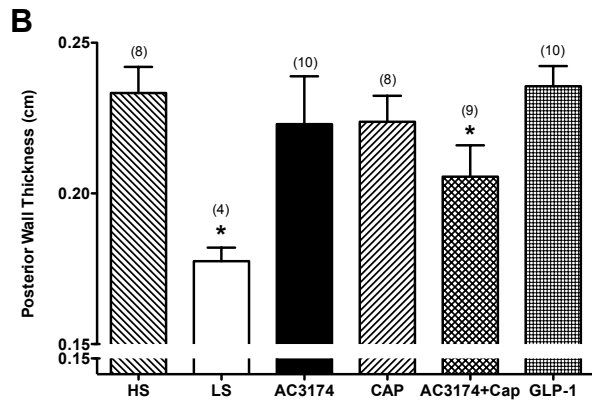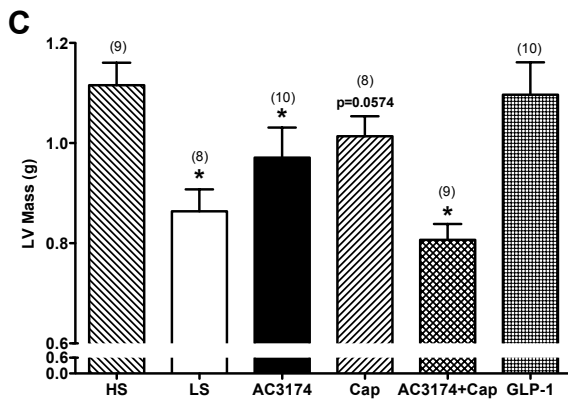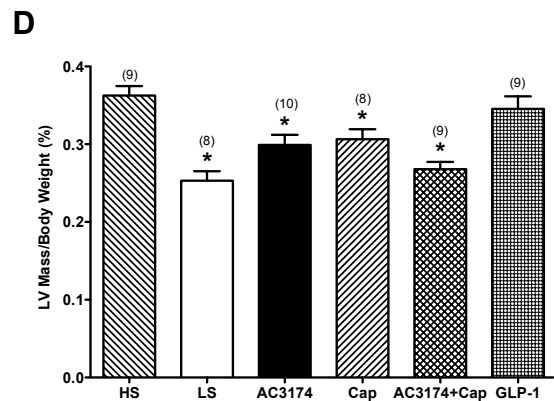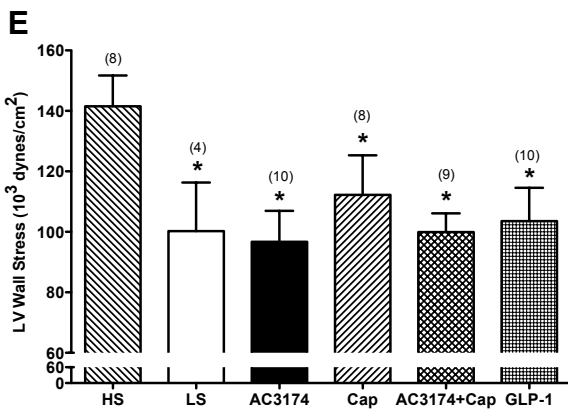

Supplement: MOESM2 [file 9539940]
